# Supplementary material for: Selective hydrogenation of 2-hydroxymethyl-5-furfural to 2,5-bis(hydroxymethyl)furan over gold sub-nano clusters
Source: Royal Society of Chemistry journal article supplement (doi:10.1039/c2ra22190j), 2012-11-05
Supplement: c2ra22190j.pdf [file c2ra22190j.pdf]

## Supplementary Information

### Selective Hydrogenation of 2,5-Hydroxymethylfurfural to 2,5-Bishydroxymethylfurfural over Supported Gold Subnanocluster

Junya Ohyama,<sup>a</sup> Akihiko Esaki,<sup>a</sup> Yuta Yamamoto,<sup>b</sup> Shigeo Arai,<sup>b</sup> Atsushi Satsuma<sup>a</sup>

<sup>a</sup> *Graduate School of Engineering, Nagoya University, Nagoya 464-8603, Japan.*

<sup>b</sup> *Ecotopia Science Institute, Nagoya University, Nagoya, 464-8603, Japan*

#### Materials

Al<sub>2</sub>O<sub>3</sub> (JRC-ALO5), TiO<sub>2</sub> (JRC-TIO-1), CeO<sub>2</sub> (JRC-CEO-2), ZrO<sub>2</sub> (JRC-ZO-1), sulfated zirconia (JRC-SZ-1) were supplied from the committee of reference catalyst, Catalysis society of Japan. TiO<sub>2</sub>-SiO<sub>2</sub> (3% SiO<sub>2</sub> 97% TiO<sub>2</sub>) and Ta<sub>2</sub>O<sub>5</sub> were obtained from Shokubai Kasei Co. Ltd. and Kojundo Chemical Lab. Co., Ltd., respectively. La<sub>2</sub>O<sub>3</sub>, HAuCl<sub>4</sub>, NaOH, and NaBH<sub>4</sub> were purchased from Kishida Chemical Co., Ltd. 2,5-Hydroxymethylfurfural (HMF) was obtained from Tokyo Chemical Industry Co., Ltd.

#### Preparation of Au catalysts.

Supported Au catalysts were prepared by deposition-precipitation method as reported elsewhere. A NaOH aqueous solution (1.0 M) was added dropwise to a 50 mL of HAuCl<sub>4</sub> aqueous solution (51 μmol) to adjust the pH of the solution to ca. 7. Metal oxide supports (1.0 g) was added to the solution and stirred at 343 K for 2 h, followed by centrifugation. The resulting residue was washed with ca. 50 mL of water and centrifuged. The washing process was repeated 5 times. The resulting powder was dried at 363 K, then calcinated under air at 573 K to prepare various metal oxides supported Au catalysts. As for Al<sub>2</sub>O<sub>3</sub> supported Au catalyst (Au/Al<sub>2</sub>O<sub>3</sub>), calcination condition was varied to control Au particle size: under air at 573, 773, and 873 K; under 100 mL/min of H<sub>2</sub> flow at 473 and 573 K. The loading amount of Au on Al<sub>2</sub>O<sub>3</sub> determined using an inductively-coupled plasma (ICP) spectrometer (Thermo Jarrel Ash IRIS/AP) was 0.83wt%.

### Preparation of Al<sub>2</sub>O<sub>3</sub> supported Pt, Pd, Ag, and Cu catalysts

Al<sub>2</sub>O<sub>3</sub> supported Pt, Pd, Ag, and Cu catalysts were prepared by impregnation method to be 1wt% of metal loading by using H<sub>2</sub>PtCl<sub>6</sub>, Pd(NO<sub>3</sub>)<sub>2</sub>, AgNO<sub>3</sub>, and Cu(CH<sub>3</sub>CO<sub>2</sub>)<sub>2</sub> as metal precursor: After the suspension containing metal precursor and Al<sub>2</sub>O<sub>3</sub> (JRC-ALO5) in water was stirred under 343 K for 1h, the suspension was evaporated to dryness; Resulting powder was dried at 353 K overnight; The powders containing Pt, Ag, and Cu were calcined at 573 K under H<sub>2</sub> for 1 h, and that containing Pd was calcined at 773 K under H<sub>2</sub> for 1 h after calcination at 773 K under air for 5 h.

### Hydrogenation of HMF.

Hydrogenation of HMF was carried out in an autoclave with a gas in- and outlet (30 mL, Taiatsu Techno Co., TVS-1 type). To a 2 mL of HMF aqueous solution (0.2 mol L<sup>-1</sup>) in an autoclave was added 10 mg of a supported Au catalyst together with a stirrer bar. The experiment were conducted under 3.8-6.5 MPa of H<sub>2</sub> at 403 – 433 K, after 5 times of replacement of air in an autoclave by ca. 1 MPa of H<sub>2</sub>. The reaction solution with 1,4-dioxane as an internal standard was analyzed by a gas chromatograph (SHIMADZU GC-14A) equipped with FID using Ultra ALLOY<sup>+</sup>-5 capillary column (Frontier Laboratories Ltd.). On the other hand, HMF (95 mg in 20 mL of water) was reduced by NaBH<sub>4</sub> (201 mg in water) to synthesize BHF. Products were identified by using a NMR spectrometer (Varian, INOVA-500, 500 MHz) and GC-MS (SHIMADZU-QP5000).

BHF

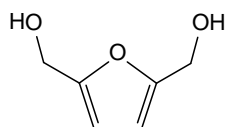

<sup>1</sup>H NMR (d-DMSO): δ 4.34 (d, 4H), 5.17 (t, 2H), 6.17 (s, 2H).

B1

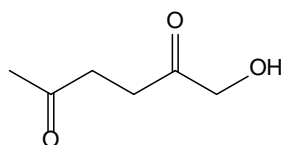

$^1\text{H}$  NMR (d-DMSO):  $\delta$  2.07 (s, 3H), 2.57 (t, 2H), 2.65 (t, 2H), 4.05 (d, 2H), 5.11 (t, 1H).

### **Recoverability and reusability of Au/Al<sub>2</sub>O<sub>3</sub>-473H, and the Au loading after reaction**

After HMF hydrogenation reaction using Au/Al<sub>2</sub>O<sub>3</sub>-473H, the supported Au catalyst was washed with water to test its recoverability and reusability. As a result, the catalyst almost did not work (HMF conversion was 0.6% using 10 mg of the catalyst under 6.5 MPa of H<sub>2</sub> at 393K for 2h.). However, interestingly, the treatment of the catalyst with O<sub>2</sub> and H<sub>2</sub> at 473K reactivated the catalyst (Conversion: 33%). The decrease of the catalytic activity might be due to growth of Au particles and change in their morphology and chemical state, which is now under investigation.

The Au loading amount of Au/Al<sub>2</sub>O<sub>3</sub>-473H after the HMF hydrogenation reaction was evaluated by using ICP spectrometer. The Au loading was 0.8wt% after the reaction, which was consistent with as-prepared catalyst. It is very likely that the Au ion does not leach under the catalytic reaction.

**Table S1.** Conversion of HMF and product yields for HMF hydrogenation over various metal supported  $\text{Al}_2\text{O}_3$ .\*

| Catalyst                    | Conversion (%) | Yield (%) |     |         |
|-----------------------------|----------------|-----------|-----|---------|
|                             |                | BHF       | B1  | Unknown |
| Pt/ $\text{Al}_2\text{O}_3$ | 100            | 0         | 28  | 72      |
| Ag/ $\text{Al}_2\text{O}_3$ | 4.5            | 4.5       | 0   | 0       |
| Cu/ $\text{Al}_2\text{O}_3$ | 0              | 0         | 0   | 0       |
| Pd/ $\text{Al}_2\text{O}_3$ | 100            | 19        | 6.1 | 74      |

\*Reaction was carried out using 10 mg of catalyst at 413 K under 3.8 MPa of  $\text{H}_2$  for 4 h.

**Table S2.** Turnover frequency per all Au atoms for 1, 0.5, and 0.1wt% Au/ $\text{Al}_2\text{O}_3$ .\*

| Catalyst                                 | Turnover frequency per all Au atoms ( $\text{h}^{-1}$ ) |
|------------------------------------------|---------------------------------------------------------|
| 1wt% (Au/ $\text{Al}_2\text{O}_3$ -473H) | 574                                                     |
| 0.5wt%                                   | 106                                                     |
| 0.1wt%                                   | 49                                                      |

\*Reaction was carried out using 10 mg of catalyst at 393 K under 6.5 MPa of  $\text{H}_2$ .

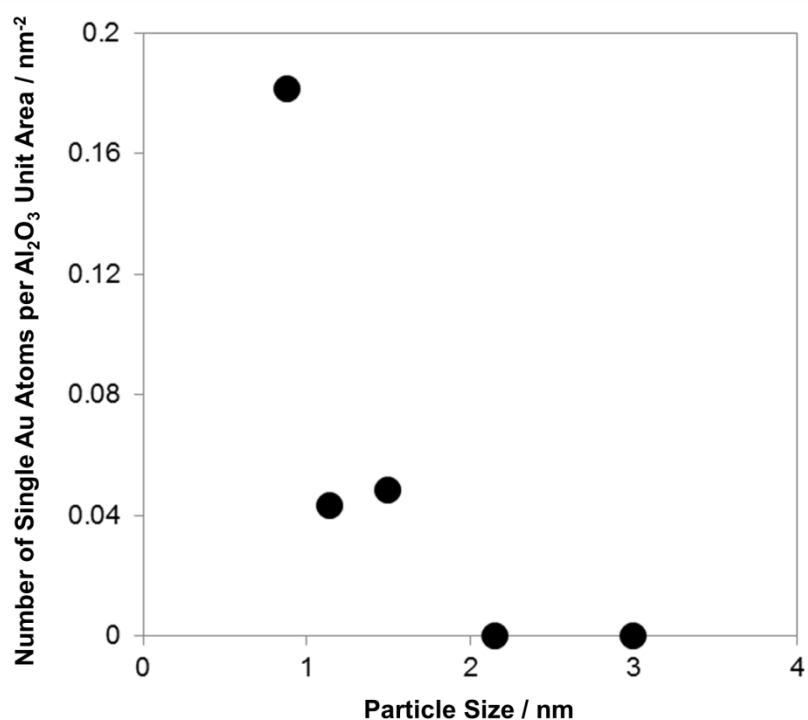

**Figure S1.** The number of Au atoms per Al<sub>2</sub>O<sub>3</sub> unit area plotted against Au particle size. The Au atoms in more than 7500 nm<sup>2</sup> of Al<sub>2</sub>O<sub>3</sub> observed on corresponding STEM images were counted.

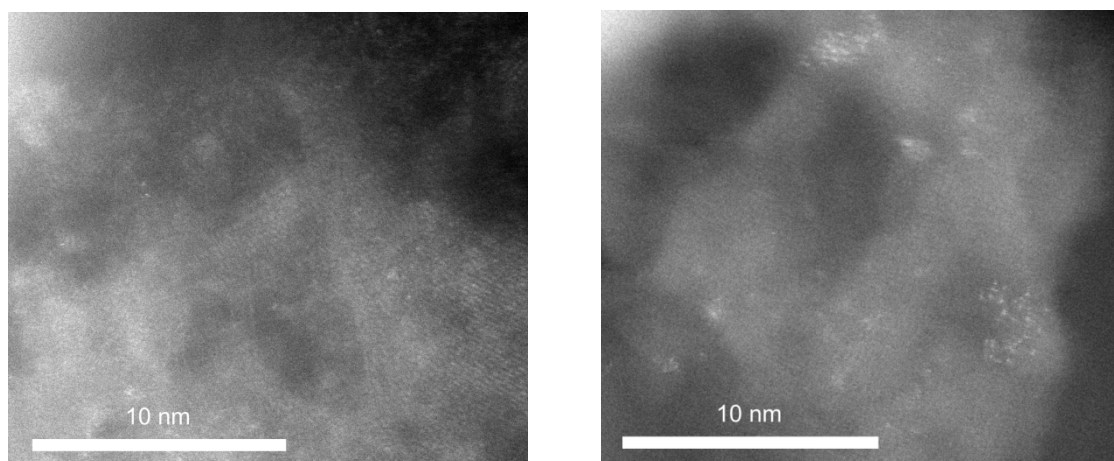

**Figure S2.** Typical HAADF STEM image of 0.1 (left) and 0.5wt% Au/Al<sub>2</sub>O<sub>3</sub> (right) prepared under 100 mL/min of H<sub>2</sub> flow at 473 K.
